# Supplementary material
Source: PubMed Central journal article supplement (PMC4847632)

## Supplemental information

In-depth Sphingomyelin Characterization using Electron Impact Excitation of Ions from  
Organics (EIEIO) and Mass Spectrometry

Takashi Baba<sup>1</sup>, J. Larry Campbell<sup>1</sup>, J. C. Yves Le Blanc<sup>1</sup> and Paul R. S. Baker<sup>2</sup>

<sup>1</sup>SCIEX, 71 Four Valley Dr., Concord, Ontario L4K 4V8, Canada

<sup>2</sup>SCIEX, 1201 Radio Rd, Redwood Shores, California, USA

**Figure SI-1 MS spectrum and SMs found in BHE**

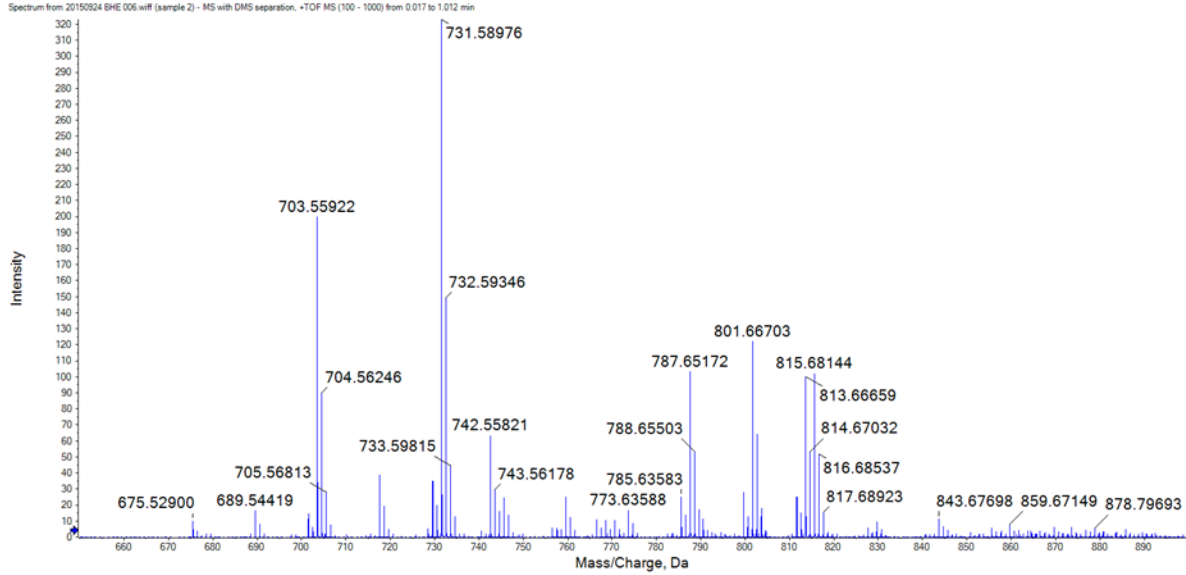

| precursor m/z | weight [%] in total | identified sphingomyelins                                                                 |
|---------------|---------------------|-------------------------------------------------------------------------------------------|
| 675.511       | 0.008               | SM(d16:1,16:0) [70%] (46 sec)                                                             |
| 689.526       | 0.017               | SM(d17:1,16:0) [100%] (14 sec)                                                            |
| 701.526       | 0.014               | SM(d18;2,16:0) [manual]                                                                   |
| 703.546       | 0.186               | SM(d18:1,16:0) [95%] (0.086 sec) SM(d16:1,18:0) [5%] (5 sec)                              |
| 717.557       | 0.038               | SM(d17:1,18:0) [100%] (3 sec)                                                             |
| 729.555       | 0.037               | SM(d18:2,18:0) [66%] (11 sec) SM(d18:1,18:1(n-9)) [34%] (11 sec)                          |
| 731.572       | 0.339               | SM(d18:1,18:0) [100%] (0.032 sec)                                                         |
| 745.577       | 0.036               | SM(d19:1,18:0) [77%] (4 sec) SM(d18:1,19:0) [23%] (6 sec)                                 |
| 759.588       | 0.034               | SM(d18:1,20:0) [88%] (4 sec)                                                              |
| 773.607       | 0.021               | SM(d17:1,22:0) [48%] (11 sec) SM(d18:1,21:0) [30%] (11 sec) SM(d16:1,23:0) [22%] (17 sec) |
| 785.609       | 0.029               | SM(d18:1,22:1) [54%] (14 sec) SM(d18:2,22:0) [46%] (14 sec)                               |
| 787.63        | 0.129               | SM(d18:1,22:0) [92%] (0.346 sec) SM(d17:1,23:0) [8%] (2 sec)                              |
| 799.624       | 0.035               | SM(d18:2,23:0) [44%] (19 sec) SM(d18:1,23:1) [30%] (19 sec) SM(d17:1,24:1) [26%] (19 sec) |
| 801.643       | 0.151               | SM(d18:1,23:0) [87%] (0.220 sec) SM(d19:1,22:0) [7%] (8 sec) SM(d17:1,24:0) [6%] (2 sec)  |
| 811.623       | 0.032               | SM(d18:1,24:2(n-6,-9)) [78%] (14 sec) SM(d18:2,24:1(n-9)) [22%] (28 sec)                  |
| 813.644       | 0.122               | SM(d18:1,24:1(n-9)) [80%] (0.549 sec) SM(d18:2,24:0) [20%] (2 sec)                        |
| 815.655       | 0.139               | SM(d18:1,24:0) [91%] (0.278 sec) SM(d19:1,23:0) [9%] (5 sec)                              |
| 827.628       | 0.007               | PC headgroup, but may not be a SM.                                                        |
| 829.649       | 0.016               | SM(d19:1,24:0) [51%] (19 sec) SM(d18:1,25:0) [49%] (19 sec)                               |
| 843.636       | 0.014               | PC(17:0,16:3) + 101.11                                                                    |
| 855.605       | 0.010               | PC(17:0,16:3) + 113.05                                                                    |

Figure SI-2 MS spectrum and SMs found in milk SM

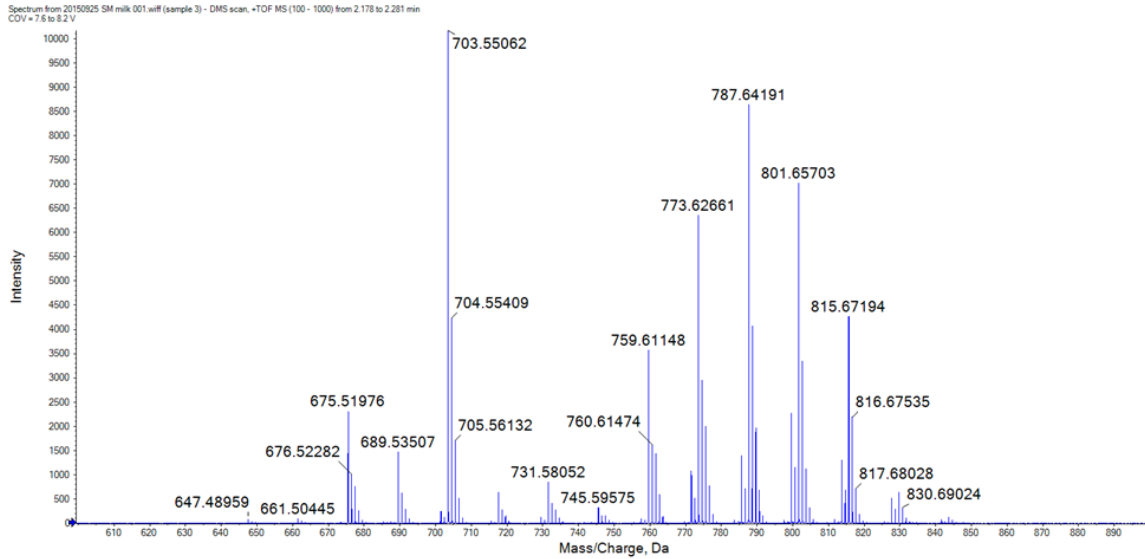

| precursor m/z | precursor intensity [%] | identified sphingomyelins                                                                                |
|---------------|-------------------------|----------------------------------------------------------------------------------------------------------|
| 647.486       | 0.16                    | SM(d16:1,14:0) [100%]                                                                                    |
| 661.502       | 0.16                    | SM(d17:1,14:0) [78%] SM(d16:1,15:0) [22%]                                                                |
| 673.501       | 0.04                    | SM(d18:2,14:0) [52%] SM(d16:1,16:1) [48%]                                                                |
| 675.508       | 3.98                    | SM(d16:1,16:0) [72%] SM(d18:1,14:0) [24%] SM(d17:1,15:0) [5%]                                            |
| 685.511       | 0.05                    | PC head group, but may not be a SM.                                                                      |
| 687.517       | 0.07                    | SM(d17:1,16:1) [100%]                                                                                    |
| 689.524       | 2.84                    | SM(d17:1,16:0) [83%] SM(d18:1,15:0) [13%]                                                                |
| 699.515       | 0.02                    | SM(d11:1,18:2) [100%]                                                                                    |
| 703.53        | 15.89                   | SM(d18:1,16:0) [91%] SM(d19:1,15:0) [9%]                                                                 |
| 715.544       | 0.08                    | SM(d17:1,18:1) [57%] SM(d19:2,16:0) [29%]                                                                |
| 717.556       | 1.07                    | SM(d19:1,16:0) [43%] SM(d18:1,17:0) [29%] SM(d17:1,18:0) [22%] SM(d20:1,15:0) [4%] SM(d16:1,19:0) [3%]   |
| 727.542       | 0.02                    | SM(d18:1,18:2) [100%]                                                                                    |
| 731.569       | 1.58                    | SM(d18:1,18:0) [79%] SM(d16:1,20:0) [16%]                                                                |
| 741.581       | 0.03                    | PC head group                                                                                            |
| 743.576       | 0.04                    | SM(d19:1,18:1) [84%]                                                                                     |
| 745.586       | 0.59                    | SM(d16:1,21:0) [55%] SM(d19:1,18:0) [23%] SM(d17:1,20:0) [14%] SM(d18:1,19:0) [8%]                       |
| 755.591       | 0.06                    | PC_HG, but may not be a SM                                                                               |
| 757.59        | 0.22                    | SM(d16:1,22:1) [81%] SM(d18:1,20:1) [9%] SM(d18:2,20:0) [5%] (n-7)[84%], (n-9)[16%]                      |
| 759.588       | 6.84                    | SM(d16:1,22:0) [88%] SM(d17:1,21:0) [7%] SM(d18:1,20:0) [4%]                                             |
| 769.573       | 0.09                    | SM(d16:1,23:2) [100%]                                                                                    |
| 771.596       | 2.13                    | SM(d16:1,23:1) [93%] SM(d17:1,22:1) [7%] (n-6)[21%], (n-9)[79%]                                          |
| 773.596       | 12.23                   | SM(d16:1,23:0) [79%] SM(d17:1,22:0) [17%] SM(d18:1,21:0) [4%]                                            |
| 783.608       | 0.16                    | SM(d16:1,24:2(n-9,*)) [79%] SM(d18:1,22:2(n-9,*)) [13%] SM(d17:1,23:1(n-9))                              |
| 785.609       | 2.73                    | SM(d16:1,24:1(n-9)) [61%] [22%] SM(d18:1,22:1(n-9)) [9%] SM(d18:2,22:0) [8%]                             |
| 787.61        | 15.75                   | SM(d18:1,22:0) [44%] SM(d16:1,24:0) [39%] SM(d17:1,23:0) [17%]                                           |
| 789.621       | 4.09                    | SM(d18:0,22:0) [manual]                                                                                  |
| 797.623       | 0.16                    | SM(d18:2,23:1(n-9)) [56%] SM(d17:1,24:2) [19%] SM(d18:1,23:2) [14%] SM(d16:1,25:2) [11%]                 |
| 799.62        | 3.93                    | SM(d18:1,23:1) [58%] SM(d16:1,25:1) [20%] SM(d17:1,24:1) [10%] SM(d18:2,23:0) [7%] (n-6)[6%], (n-9)[94%] |
| 801.621       | 12.64                   | SM(d18:1,23:0) [77%] SM(d17:1,24:0) [12%] SM(d19:1,22:0) [12%]                                           |
| 811.633       | 0.15                    | SM(d18:1,24:2) [63%] SM(d18:2,24:1(n-9)) [32%] SM(d19:1,23:1(n-9))                                       |
| 813.637       | 2.47                    | SM(d18:1,24:1(n-9)) [71%] [14%] SM(d18:2,24:0) [8%] SM(d17:1,25:1(n-9)) [7%]                             |
| 815.641       | 7.59                    | SM(d18:1,24:0) [80%] SM(d19:1,23:0) [20%]                                                                |
| 825.642       | 0.07                    | SM(d18:2,25:1) [39%] SM(d19:1,24:2) [21%] SM(d20:2,23:1) [19%]                                           |
| 829.667       | 1.34                    | SM(d19:1,24:0) [52%] SM(d18:1,25:0) [33%] SM(d20:1,23:0) [12%]                                           |
| 841.674       | 0.13                    | SM(d19:1,25:1(n-9)) [53%] SM(d20:2,24:0) [18%] SM(d20:1,24:1(n-9)) [16%]                                 |
| 843.686       | 0.25                    | SM(d18:1,26:0) [49%] SM(d20:1,24:0) [30%] SM(d19:1,25:0) [21%]                                           |
| 847.657       | 0.05                    | SM possible.                                                                                             |
| 849.622       | 0.02                    | SM possible.                                                                                             |
| 874.726       | 0.02                    | SM(d16:1,23:0)+101.11                                                                                    |
| 886.698       | 0.03                    | SM(d16:1,24:1)+101.11                                                                                    |

**Figure SI-3 MS spectrum and SMs found in egg SM**

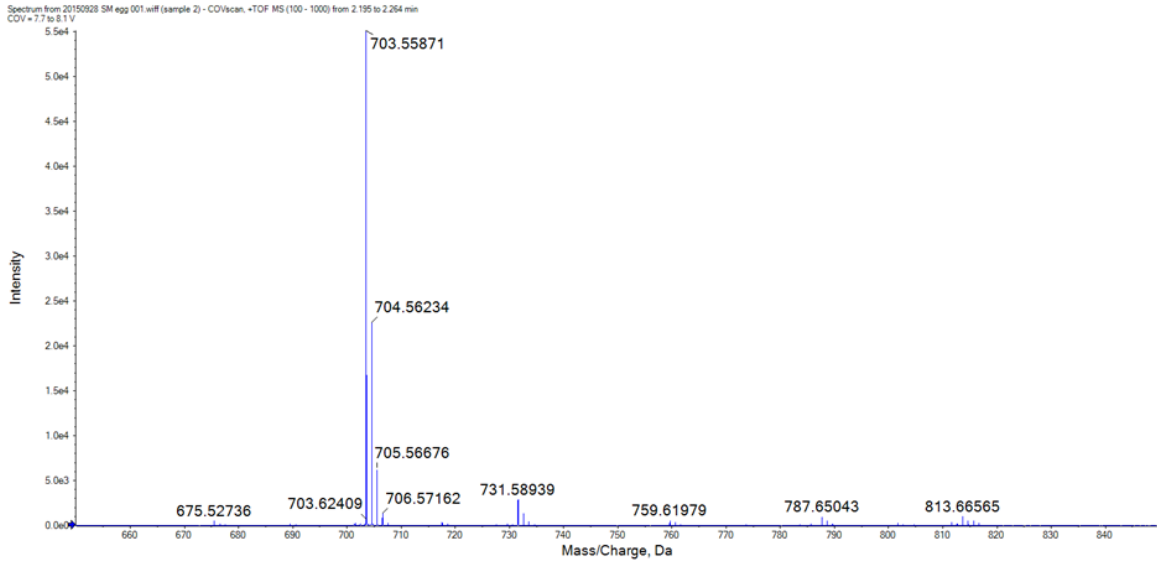

| precursor m/z | precursor intensity [%] | identified SM                                                 |
|---------------|-------------------------|---------------------------------------------------------------|
| 675.518       | 0.90                    | SM(d18:1,14:0) [100%]                                         |
| 685.53        | 0.03                    | PC head group, but may not be a SM.                           |
| 689.535       | 0.34                    | SM(d18:1,15:0) [55%] SM(d17:1,16:0) [41%] SM(d19:1,14:0) [5%] |
| 699.522       | 0.02                    | SM(d18:1,16:2) [manual]                                       |
| 701.534       | 0.54                    | SM(d18:2,16:0) [61%] SM(d18:1,16:1(n-9)) [39%]                |
| 703.518       | 83.47                   | SM(d18:1,16:0) [90%] SM(d19:1,15:0) [10%]                     |
| 715.547       | 0.03                    | SM, but chains are not identified.                            |
| 717.562       | 0.62                    | SM(d18:1,17:0) [85%] SM(d19:1,16:0) [15%]                     |
| 725.531       | 0.01                    | SM(d18:1,18:3) [manual]                                       |
| 727.55        | 0.20                    | SM(d18:1,18:2(n-6,-9)) [100%]                                 |
| 729.564       | 0.41                    | SM(d18:1,18:1(n-9)) [94%] SM(d18:2,18:0) [6%]                 |
| 731.57        | 5.36                    | SM(d18:1,18:0) [94%] SM(d19:1,17:0) [6%]                      |
| 745.593       | 0.12                    | SM(d18:1,19:0) [86%] SM(d19:1,18:0) [14%]                     |
| 755.579       | 0.02                    | SM(d18:1,20:2) [100%]                                         |
| 757.593       | 0.11                    | SM(d18:1,20:1(n-9)) [91%]                                     |
| 759.606       | 1.06                    | SM(d18:1,20:0) [94%] SM(d19:1,19:0) [6%]                      |
| 773.623       | 0.14                    | SM(d18:1,21:0) [100%]                                         |
| 781.592       | 0.02                    | SM(d18:1,22:3) [100%]                                         |
| 783.607       | 0.13                    | SM(d18:1,22:2(n-6,-9)) [100%]                                 |
| 785.62        | 0.29                    | SM(d18:1,22:1(n-9)) [93%]                                     |
| 787.631       | 1.83                    | SM(d18:1,22:0) [94%]                                          |
| 799.635       | 0.07                    | SM(d18:1,23:1(n-9)) [95%]                                     |
| 801.648       | 0.44                    | SM(d18:1,23:0) [92%] SM(d19:1,22:0) [8%]                      |
| 804.662       | 0.10                    | SM(d18:1,16:0)+101.1                                          |
| 807.613       | 0.06                    | SM(d18:1,24:4(n-6,-9,-12,-15)) [100%]                         |
| 809.621       | 0.12                    | SM(d18:1,24:3(n-6,-9,-12)) [100%]                             |
| 811.633       | 0.66                    | SM(d18:1,24:2(n-6,-9)) [91%]                                  |
| 813.643       | 1.85                    | SM(d18:1,24:1(n-9)) [94%]                                     |
| 829.657       | 0.07                    | SM(d18:1,25:0) [95%]                                          |

Figure SI-4 sphingolipid backbone and acyl constituents. A: brain SM, B: milk SM, C: egg SM and D: BHE.

A: brain

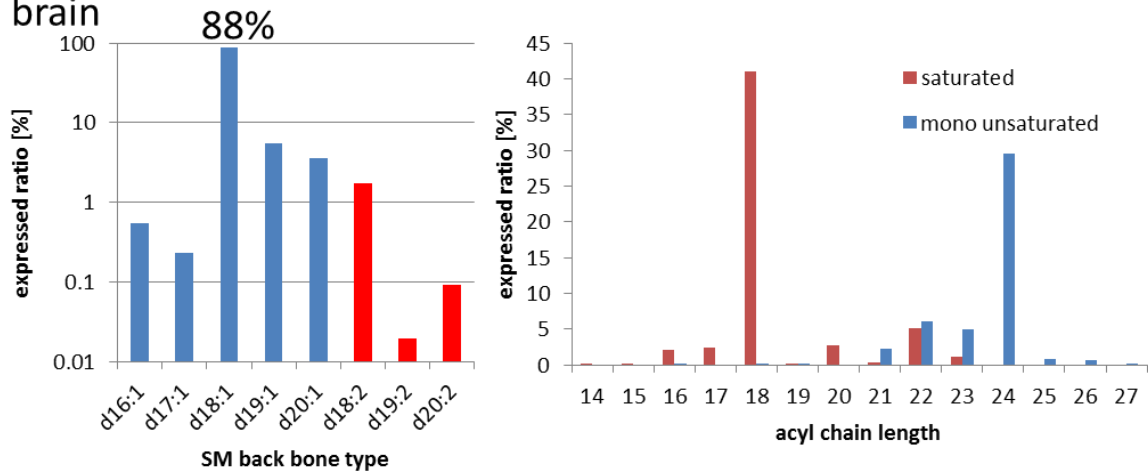

B: milk

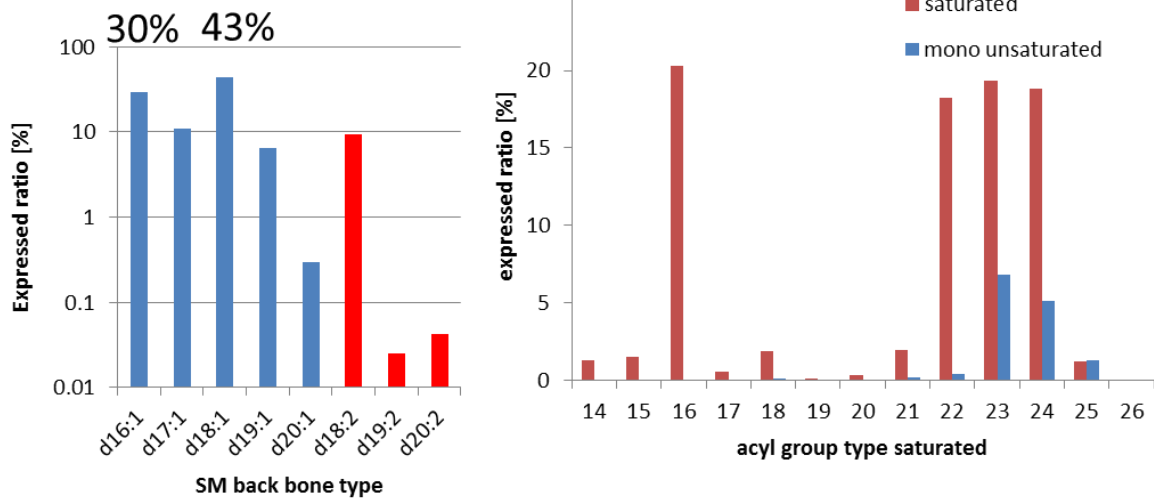

C: egg

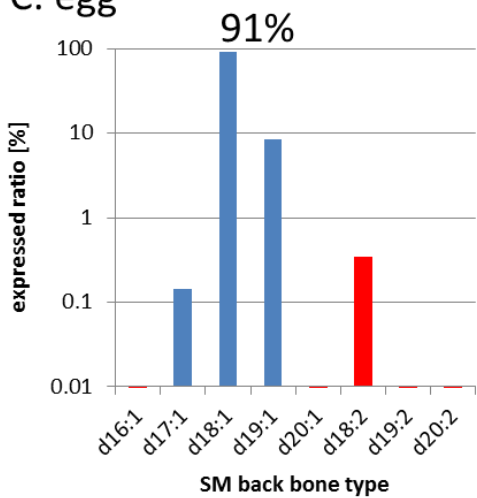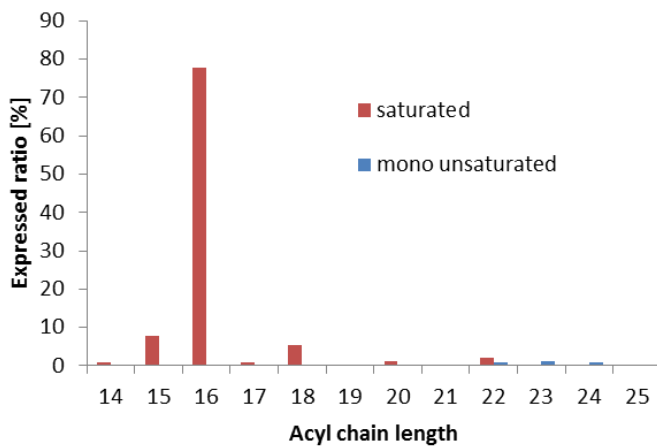

D: BHE

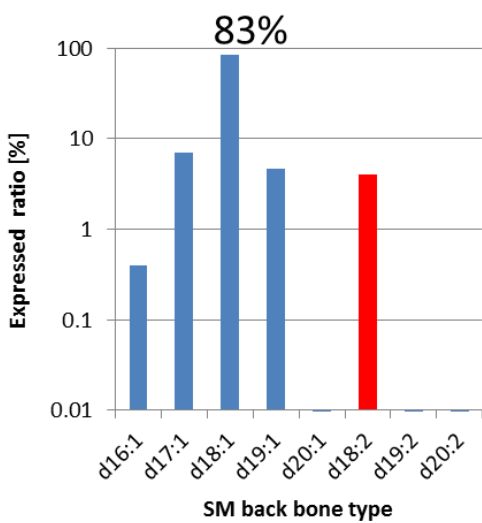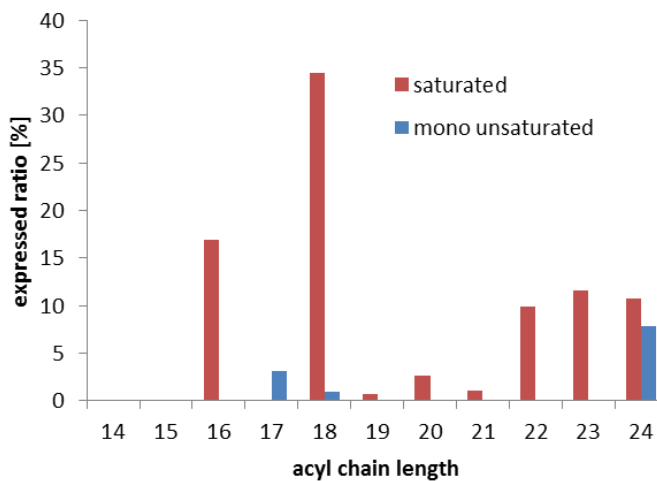

### Figure SI-5 milk SM treated iodine vapor

Evapolated Milk SM was exposed to iodine vapor for 10 min. The color changed from white to deep brown. DMS separated the type of modification. (top) non modified SM profile. Hydrogen-iodine replacement reaction was observed in all types of SMs(middle). Double bond opening reaction appeared only in SM with an unsaturated allyl (bottom).

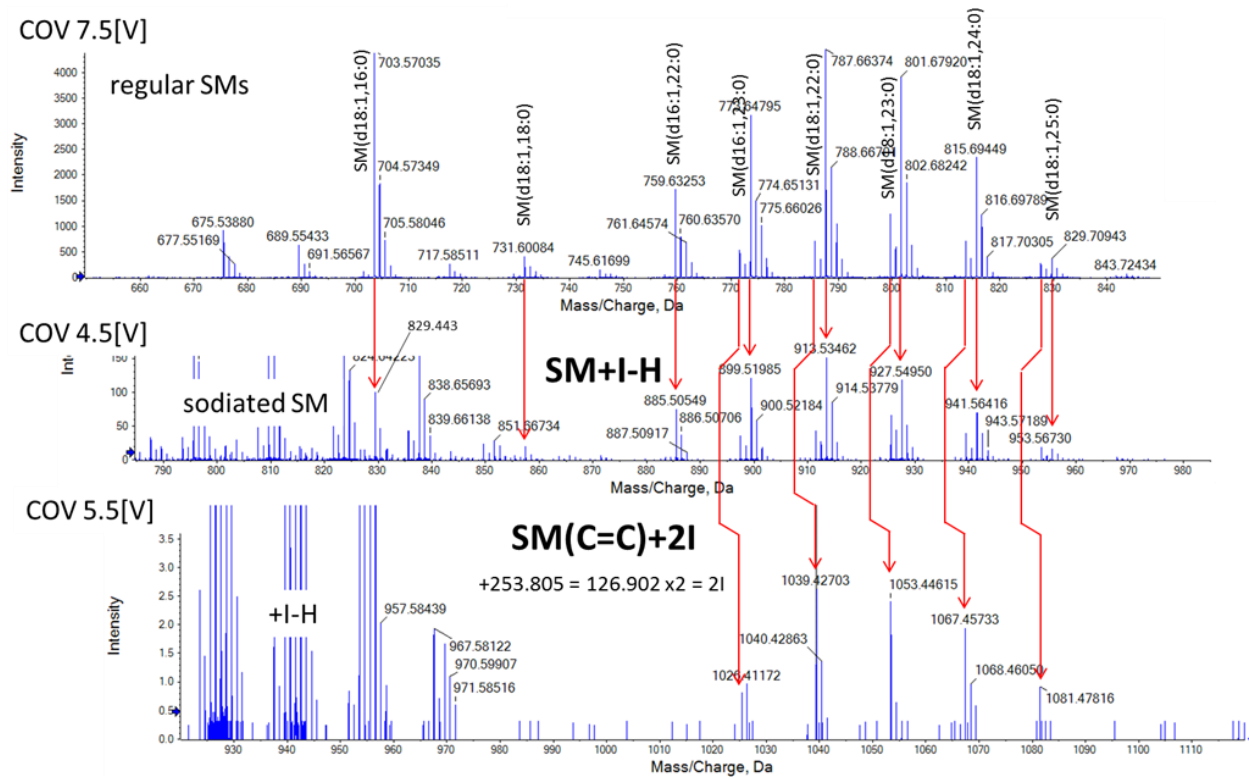

Supplement: 10.1194_M067199_jlr.M067199-1.pdf [file 10.1194_M067199_jlr.M067199-1.pdf]
